# Supplementary material for: The Lübeck Medication Satisfaction Questionnaire—A Novel Measurement Tool for Therapy Satisfaction
Source: MDPI journal article supplement (doi:10.3390/jpm13030505), 2023-03-10
Supplement: s1 [file s1]

## Supplement

Supplementary Table S1: LMSQ – German Version (Lübecker Fragebogen zur Therapiezufriedenheit)

|                | <b>Aussage</b>                                                                                          | <b>1</b> | <b>2</b> | <b>3</b> | <b>4</b> |
|----------------|---------------------------------------------------------------------------------------------------------|----------|----------|----------|----------|
| <b>LMSQ_1</b>  | Mir passt der Zeitplan, nach dem ich meine Medikamente nehme, sehr gut.                                 |          |          |          |          |
| <b>LMSQ_2</b>  | Ich fühle mich in meinen Alltagsaktivitäten durch die Nebenwirkungen meiner Medikamente eingeschränkt.* |          |          |          |          |
| <b>LMSQ_3</b>  | Meine Medikamente sind sehr bequem zu nehmen.                                                           |          |          |          |          |
| <b>LMSQ_4</b>  | Meine Behandlung stellt mich im Großen und Ganzen zufrieden.                                            |          |          |          |          |
| <b>LMSQ_5</b>  | Meine Symptome werden durch meine Medikamente gelindert.                                                |          |          |          |          |
| <b>LMSQ_6</b>  | Ich fühle mich durch meinen Arzt/meine Ärztin gut über meine Erkrankung aufgeklärt.                     |          |          |          |          |
| <b>LMSQ_7</b>  | Ich bin mit dem Geschmack und der Größe meiner Medikamente zufrieden.                                   |          |          |          |          |
| <b>LMSQ_8</b>  | Mein Arzt/meine Ärztin hat mir die Vor- und Nachteile der Behandlungsmöglichkeiten genau erläutert.     |          |          |          |          |
| <b>LMSQ_9</b>  | Ich kann durch die Nebenwirkungen meiner Medikamente weniger Sport machen.*                             |          |          |          |          |
| <b>LMSQ_10</b> | Durch meine Medikamente fällt es mir leichter, Körperpflege (Zähne putzen, duschen usw.) zu betreiben.  |          |          |          |          |
| <b>LMSQ_11</b> | Vor Beginn der Behandlung habe ich mich schlechter gefühlt als jetzt.                                   |          |          |          |          |
| <b>LMSQ_12</b> | Die Medikamente helfen mir, durch meinen Alltag zu kommen.                                              |          |          |          |          |
| <b>LMSQ_13</b> | Mein Arzt/Meine Ärztin hat mich über die beste Art der Behandlung aufgeklärt.                           |          |          |          |          |
| <b>LMSQ_14</b> | Ich bin zufrieden mit der Länge der Zeit, die vergeht, bis meine Medikamente wirken.                    |          |          |          |          |
| <b>LMSQ_15</b> | Ich bin glücklich mit meiner Behandlung.                                                                |          |          |          |          |
| <b>LMSQ_16</b> | Dank der Medikamente kann ich an Freizeitaktivitäten teilnehmen.                                        |          |          |          |          |

|                |                                                                                                |  |  |  |  |
|----------------|------------------------------------------------------------------------------------------------|--|--|--|--|
| <b>LMSQ_17</b> | Ich kann durch die Nebenwirkungen der Medikamente meine Freizeit nicht mehr so sehr genießen.* |  |  |  |  |
| <b>LMSQ_18</b> | Ich habe vor, meine Behandlung fortzusetzen.                                                   |  |  |  |  |

*Supplementary Table S1. German version of the Lübeck Medication Satisfaction Questionnaire. The questionnaire consists of 18 statements (LMSQ\_1 to LMSQ\_18) each rated on a four-point Likert scale ranging from one to four. 1=stimme gar nicht zu, 2=stimme nicht zu, 3=stimme zu, 4=stimme voll zu. Statements LMSQ\_2, LMSQ\_9 and LMSQ\_17 are marked with an asterisk indicating that they were phrased negatively and therefore need to be inverted before the evaluation.*
